# Supplementary material for: Similar patterns of clonally expanded somatic mtDNA mutations in the colon of heterozygous mtDNA mutator mice and ageing humans
Source: PubMed Central journal article supplement (PMC4141908; doi:10.1016/j.mad.2014.06.003), 2014-07
Supplement: mmc1.pdf [file mmc1.pdf]

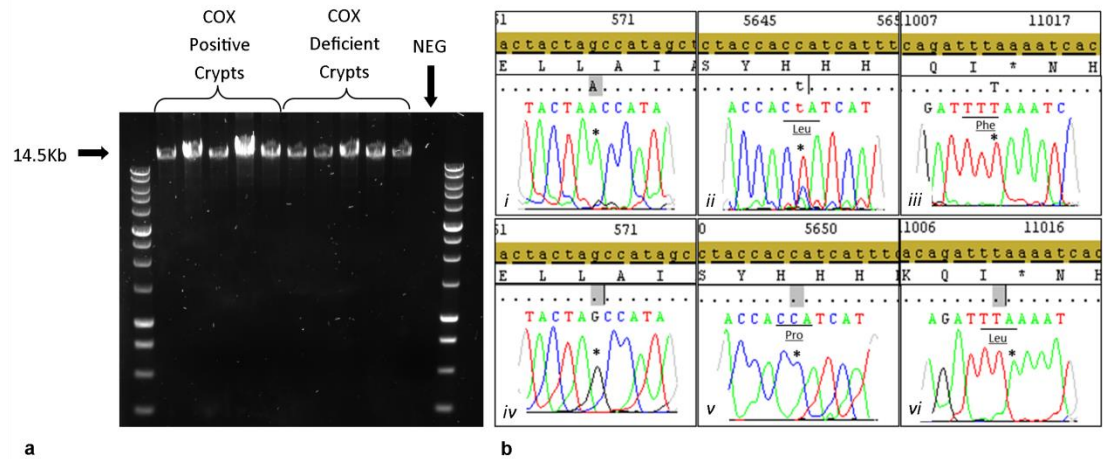

### Supplementary File 1: Mutational analysis of crypts from *PolgA*<sup>+/Mut</sup> mice.

**(a):** Example 0.8% Agarose gel showing Long-range PCR products. The wild-type band is 14.5Kb; deleted species would appear as smaller bands. Only full-length bands were detected in both COX-positive and COX deficient crypts. **(b)**

Sequencing electropherograms showing examples of point mutations detected in COX deficient colonic crypts from *PolgA*<sup>+/mut</sup> mice. **(i)** Electropherogram showing the homoplasmic m. 568 G>A transition in *MT-srRNA*. **(ii)** Electropherogram showing the heteroplasmic (75%) m.5647 C>T transition. This change predicts a proline to leucine amino acid change in *MT-CO1*. **(iii)** Electropherogram showing the homoplasmic m.11012 A>T transversion. This change predicts a leucine to phenylalanine amino acid change in *MT-ND4*. Wild-type homogenate sequences are shown in panels **(iv-vi)**.
