# Supplementary material for: Similar patterns of clonally expanded somatic mtDNA mutations in the colon of heterozygous mtDNA mutator mice and ageing humans
Source: PubMed Central journal article supplement (PMC4141908; doi:10.1016/j.mad.2014.06.003), 2014-07
Supplement: mmc2.pdf [file mmc2.pdf]

| Crypt | COX Histochemistry | Mutation    | WT base | Mutant base | Heteroplasmy level | Gene                         | Codon change | Amino acid change | Substitution type |
|-------|--------------------|-------------|---------|-------------|--------------------|------------------------------|--------------|-------------------|-------------------|
| 1     | Deficient          | m.4892 T>C  | T       | C           | 100%               | <i>MT-ND2</i>                | TTC          | Phe-Phe           | syn               |
|       | Deficient          | m.6779 T>C  | T       | C           | 25%                | <i>MT-CO1</i>                | CCA          | Ser-Pro           | ns                |
| 2     | Deficient          | m.4892 T>C  | T       | C           | 100%               | <i>MT-ND2</i>                | TTC          | Phe-Phe           | syn               |
|       | Deficient          | m.5831 T>C  | T       | C           | 50%                | <i>MT-CO1</i>                | ACT          | Ile-Thr           | ns                |
|       | Deficient          | m.7413 C>T  | C       | T           | 50%                | <i>MT-CO2</i>                | TGA          | Arg-Trp           | ns                |
|       | Deficient          | m.9740 T>C  | T       | C           | 100%               | <i>MT-ND3</i>                | CCA          | Leu-Pro           | ns                |
|       | Deficient          | m.10392 A>G | A       | G           | 25%                | <i>MT-ND4</i>                | CTG          | Leu-Leu           | syn               |
|       | Deficient          | m.13817 G>T | G       | T           | 25%                | <i>MT-ND6</i>                | AAA          | Asn-Lys           | ns                |
|       | Deficient          | m.13852 C>T | C       | T           | 50%                | <i>MT-ND6</i>                | ACT          | Ala-Thr           | ns                |
| 3     | Deficient          | m.6098 T>A  | T       | A           | 75%                | <i>MT-CO1</i>                | GAA          | Val-Glu           | ns                |
| 4     | Deficient          | m.986 G>A   | G       | A           | 50%                | <i>MT-16SrRNA</i>            | -            | -                 |                   |
|       | Deficient          | m.2283 G>T  | G       | T           | 50%                | <i>MT-16SrRNA</i>            | -            | -                 |                   |
|       | Deficient          | m.6024 G>A  | G       | A           | 75%                | <i>MT-CO1</i>                | CAA          | Gln-Gln           | syn               |
| 5     | Deficient          | m.1214 C>G  | C       | G           | 75%                | <i>MT-16SrRNA</i>            | -            |                   |                   |
|       | Deficient          | m.5695 G>A  | G       | A           | 100%               | <i>MT-CO1</i>                | AGA          | Gly-Gly           | syn               |
|       | Deficient          | m.6835 C>T  | C       | T           | 75%                | <i>MT-CO1</i>                | TAC          | His-Tyr           | ns                |
|       | Deficient          | m.6919 C>T  | C       | T           | 100%               | <i>MT-tRNA<sup>Ser</sup></i> | -            |                   |                   |
|       | Deficient          | m.7641 G>A  | G       | A           | 100%               | <i>MT-CO2</i>                | ATC          | Val-Ile           | ns                |
| 6     | Deficient          | m.506 C>T   | C       | T           | 75%                | <i>MT-12SrRNA</i>            | -            | -                 |                   |
|       | Deficient          | m.812 C>G   | C       | G           | 75%                | <i>MT-12SrRNA</i>            | -            | -                 |                   |
|       | Deficient          | m.2424 C>T  | C       | T           | 50%                | <i>MT-16SrRNA</i>            | -            | -                 |                   |
|       | Deficient          | m.2446 C>T  | C       | T           | 75%                | <i>MT-16ArRNA</i>            | -            | -                 |                   |
|       | Deficient          | m.4946 A>G  | A       | G           | 75%                | <i>MT-ND2</i>                | GCC          | Thr-Ala           | ns                |
|       | Deficient          | m.11539 C>T | C       | T           | 25%                | <i>MT-ND4</i>                | ATA          | Thr-Met           | ns                |
|       | Deficient          | m.15243 C>T | C       | T           | 50%                | <i>MT-CYB</i>                | TCA          | Pro-Ser           | ns                |
| 7     | Deficient          | m.3429 G>A  | G       | A           | 75%                | <i>MT-ND1</i>                | AAG          | Glu-Lys           | ns                |
|       | Deficient          | m.5713 A>G  | A       | G           | 25%                | <i>MT-CO1</i>                | TGC          | Tyr-Cys           | ns                |
|       | Deficient          | m.5894 T>A  | T       | A           | 75%                | <i>MT-CO1</i>                | CTA          | Leu_leu           | syn               |

| Crypt | COX Histochemistry | Mutation    | WT base | Mutant base | Heteroplasmy level | Gene               | Codon change | Amino acid change | Substitution type |
|-------|--------------------|-------------|---------|-------------|--------------------|--------------------|--------------|-------------------|-------------------|
|       | Deficient          | m.6444 G>C  | G       | C           | 50%                | <i>MT-CO1</i>      | CTA          | Val-Leu           | ns                |
|       | Deficient          | m.14400 G>A | G       | A           | 25%                | <i>MT-CYB</i>      | AGA          | Gly-Null          | ns                |
|       | Deficient          | m.16254 G>A | G       | A           | 50%                | <i>ctrl region</i> | -            | -                 | -                 |
| 8     | Deficient          | m.847 T>A   | T       | A           | 50%                | <i>MT-12SrRNA</i>  | -            | -                 |                   |
|       | Deficient          | m.2537 G>A  | G       | A           | 50%                | <i>MT-16SrRNA</i>  | -            | -                 |                   |
|       | Deficient          | m.4143 A>T  | A       | T           | 25%                | <i>MT-ND2</i>      | ATC          | Asn-Ile           | ns                |
|       | Deficient          | m.5959 C>T  | C       | T           | 50%                | <i>MT-CO1</i>      | ATA          | Thr-Met           | ns                |
|       | Deficient          | m.8126 C>T  | C       | T           | 50%                | <i>MT-ATP6</i>     | ATA          | Thr-Met           | ns                |
|       | Deficient          | m.8744 C>T  | C       | T           | 75%                | <i>MT-CO3</i>      | GGT          | Gly-Gly           | syn               |
| 9     | Deficient          | m.1181 A>G  | A       | G           | 25%                | <i>MT-16SrRNA</i>  | -            |                   |                   |
|       | Deficient          | m.6305 C>T  | C       | T           | 25%                | <i>MT-CO1</i>      | ACT          | Thr-Thr           | syn               |
|       | Deficient          | m.11402 T>A | T       | A           | 50%                | <i>MT-ND4</i>      | ATA          | Ile-Met           | ns                |
|       | Deficient          | m.12015 G>A | G       | A           | 25%                | <i>MT-ND5</i>      | ATA          | Val-Met           | ns                |
| 10    | Deficient          | m.221 C>T   | C       | T           | 75%                | <i>MT-12SrRNA</i>  |              |                   |                   |
|       | Deficient          | m.2649 C>T  | C       | T           | 50%                | <i>MT-16SrRNA</i>  |              |                   |                   |
|       | Deficient          | m.2807 C>T  | C       | T           | 75%                | <i>MT-ND1</i>      | TTT          | Phe-Phe           | syn               |
|       | Deficient          | m.2970 G>A  | G       | A           | 75%                | <i>MT-ND1</i>      | ACA          | Ala-Thr           | ns                |
|       | Deficient          | m.6402 T>C  | T       | C           | 75%                | <i>MT-CO1</i>      | CCC          | Ser-Pro           | ns                |
|       | Deficient          | m.7533 C>T  | C       | T           | 50%                | <i>MT-CO2</i>      | GTC          | Ala-Val           | ns                |
|       | Deficient          | m.10360 T>C | T       | C           | 25%                | <i>MT-ND4</i>      | TCA          | Leu-Ser           | ns                |
|       | Deficient          | m.15357 C>T | C       | T           | 75%                | <i>Mt-tRNA P</i>   |              |                   |                   |
| 11    | Deficient          | m.4925 C>T  | C       | T           | 25%                | <i>MT-ND2</i>      | TCC          | Pro-Ser           | ns                |
|       | Deficient          | m.5714 C>T  | C       | T           | 25%                | <i>MT-CO1</i>      | TAT          | Tyr-Tyr           | syn               |
|       | Deficient          | m.5977 C>T  | C       | T           | 25%                | <i>MT-CO1</i>      | ATA          | Thr-Met           | ns                |
| 12    | Deficient          | m.212 G>A   | G       | A           | 25%                | <i>MT-12SrRNA</i>  |              |                   |                   |
|       | Deficient          | m.366 C>T   | C       | T           | 75%                | <i>MT-12SrRNA</i>  |              |                   |                   |
|       | Deficient          | m.2745 C>T  | C       | T           | 100%               | <i>MT-tRNA L1</i>  |              |                   |                   |
|       | Deficient          | m.3053 G>A  | G       | A           | 75%                | <i>MT-ND1</i>      | GGA          | Gly-Gly           | syn               |

| Crypt | COX Histochemistry | Mutation    | WT base | Mutant base | Heteroplasmy level | Gene               | Codon change | Amino acid change | Substitution type |
|-------|--------------------|-------------|---------|-------------|--------------------|--------------------|--------------|-------------------|-------------------|
|       | Deficient          | m.4830 C>T  | C       | T           | 25%                | <i>MT-ND2</i>      | CTA          | Pro-Leu           | ns                |
|       | Deficient          | m.6640 G>A  | G       | A           | 75%                | <i>MT-CO1</i>      | CAA          | Arg-Gln           | ns                |
|       | Deficient          | m.6886 C>T  | C       | T           | 75%                | <i>MT-tRNA S1</i>  |              |                   |                   |
|       | Deficient          | m.8489 C>T  | C       | T           | 75%                | <i>MT-ATP6</i>     | ATA          | Thr-Met           | ns                |
|       | Deficient          | m.9268 G>A  | G       | A           | 75%                | <i>MT-CO3</i>      | CAA          | Gln-STOP          | ns                |
|       | Deficient          | m.10165 C>T | C       | T           | 25%                | <i>MT-ND4 L</i>    | TAA          | Ala-Val           | ns                |
|       | Deficient          | m.11062 C>T | C       | T           | 50%                | <i>MT-ND4</i>      | GTA          | Ala-Val           | ns                |
|       | Deficient          | m.11643 C>T | C       | T           | 75%                | <i>MT- tRNA S2</i> |              |                   |                   |
|       | Deficient          | m.12862 G>A | G       | A           | 75%                | <i>MT-ND5</i>      | GAA          | Val-Glu           | ns                |
|       | Deficient          | m.12946 G>A | G       | A           | 75%                | <i>MT-ND5</i>      | TAC          | Cys-Tyr           | ns                |
|       | Deficient          | m.13268 A>G | A       | G           | 25%                | <i>MT-ND5</i>      | ATG          | Met-Met           | syn               |
|       | Deficient          | m.14471 T>C | T       | C           | 75%                | <i>MT-CYB</i>      | TTC          | Phe-Phe           | syn               |
| 13    | Deficient          | m.4966 C>T  | C       | T           | 75%                | <i>MT-tRNA W</i>   |              |                   |                   |
|       | Deficient          | m.5440 G>A  | G       | A           | 75%                | <i>MT-CO1</i>      | CAA          | Arg-Gln           | ns                |
|       | Deficient          | m.10387 C>T | C       | T           | 25%                | <i>MT-ND4</i>      | CTA          | Pro-Leu           | ns                |
|       | Deficient          | m.10420 A>G | A       | G           | 50%                | <i>MT-ND4</i>      | AGA          | Lys-Null          | ns                |
|       | Deficient          | m.14309 C>T | C       | T           | 50%                | <i>MT-CYB</i>      | TAT          | Tyr-Tyr           | syn               |
|       | Deficient          | m.14326 C>T | C       | T           | 50%                | <i>MT-CYB</i>      | ATA          | Thr-Met           | ns                |
|       | Deficient          | m.15632 C>T | C       | T           | 25%                | <i>Ctrl region</i> |              |                   |                   |
| 14    | Deficient          | m.239 C>T   | C       | T           | 25%                | <i>MT-12SrRNA</i>  |              |                   |                   |
|       | Deficient          | m. 2461 G>T | G       | T           | 50%                | <i>MT-16SrRNA</i>  |              |                   |                   |
|       | Deficient          | m.3278 G>A  | G       | A           | 25%                | <i>MT-ND1</i>      | CTA          | Leu-Leu           | syn               |
|       | Deficient          | m. 3649 T>A | T       | A           | 50%                | <i>MT-ND1</i>      | TAA          | Leu-STOP          | ns                |
|       | Deficient          | m.5580 C>T  | C       | T           | 50%                | <i>MT-CO1</i>      | TTA          | Leu-Leu           | syn               |
|       | Deficient          | m.7486 C>T  | C       | T           | 25%                | <i>MT-CO2</i>      | GAT          | Asp-Asp           | syn               |
|       | Deficient          | m.12241 C>T | C       | T           | 25%                | <i>MT-ND5</i>      | GTA          | Ala-Val           | ns                |
|       | Deficient          | m.12986 C>T | C       | T           | 25%                | <i>MT-ND5</i>      | GCT          | Ala-Ala           | syn               |
|       | Deficient          | m.12997 C>T | C       | T           | 25%                | <i>MT-ND5</i>      | ATA          | Thr-Met           | ns                |

| Crypt | COX Histochemistry | Mutation    | WT base | Mutant base | Heteroplasmy level | Gene                       | Codon change | Amino acid change | Substitution type |
|-------|--------------------|-------------|---------|-------------|--------------------|----------------------------|--------------|-------------------|-------------------|
|       | Deficient          | m.14617 C>T | C       | T           | 75%                | <i>MT-CYB</i>              | ATA          | Thr-Met           | ns                |
| 15    | Deficient          | m.9077 c>T  | C       | T           | 25%                | <i>MT-CO3</i>              | AAT          | Asn-Asn           | syn               |
|       | Deficient          | m.14537 C>T | C       | T           | 25%                | <i>MT-CYB</i>              | TAT          | Tyr-Tyr           | syn               |
|       | Deficient          | m.15529 A>T | A       | T           | 25%                | <i>Ctrl Region / ETAS2</i> |              |                   |                   |
| 16    | Deficient          | m.491 G>T   | G       | T           | 50%                | <i>MT-12SrRNA</i>          |              |                   |                   |
|       | Deficient          | m.501 C>T   | C       | T           | 25%                | <i>MT-12SrRNA</i>          |              |                   |                   |
|       | Deficient          | m.1001 A>T  | A       | T           | 25%                | <i>MT-12SrRNA</i>          |              |                   |                   |
|       | Deficient          | m.2411 C>T  | C       | T           | 25%                | <i>MT-16SrRNA</i>          |              |                   |                   |
|       | Deficient          | m.6186 G>A  | G       | A           | 25%                | <i>MT-CO1</i>              | ATA          | Val-Met           | ns                |
|       | Deficient          | m.6418 A>T  | A       | T           | 75%                | <i>MT-CO1</i>              | GTC          | Asp-Val           | ns                |
|       | Deficient          | m.7772 C>T  | C       | T           | 50%                | <i>MT-ATP8</i>             | TAA          | Gln-STOP          | ns                |
|       | Deficient          | m.8109 C>T  | C       | T           | 50%                | <i>MT-ATP6</i>             | CAT          | His-His           | syn               |
| 17    | Deficient          | m.5032 C>T  | C       | T           | 75%                | <i>MT-tRNA A</i>           |              |                   |                   |
|       | Deficient          | m.9430 T>C  | T       | C           | 75%                | <i>MT-tRNA G</i>           |              |                   |                   |
|       | Deficient          | m.9666 G>A  | G       | A           | 75%                | <i>MT-ND3</i>              | ACT          | Ala-Thr           | ns                |
|       | Deficient          | m.11317 C>T | C       | T           | 75%                | <i>MT-ND4</i>              | TTA          | ser-Leu           | ns                |
|       | Deficient          | m.12218 C>T | C       | T           | 75%                | <i>MT-ND5</i>              | TAT          | Tyr-Tyr           | syn               |
|       | Deficient          | m.13403 C>T | C       | T           | 75%                | <i>MT-ND5</i>              | GAT          | Asp-Asp           | syn               |
|       | Deficient          | m.15005 A>T | A       | T           | 25%                | <i>MT-CYB</i>              | AAT          | Lys-Asn           | ns                |
|       | Deficient          | m.15298 G>A | G       | A           | 75%                | <i>MT-tRNA T</i>           |              |                   |                   |
| 18    | Deficient          | m.5718 C>T  | C       | T           | 50%                | <i>MT-CO1</i>              | TCT          | Pro-ser           | ns                |
|       | Deficient          | m.11508 A>T | A       | T           | 50%                | <i>MT-ND4</i>              | TCT          | Thr-Ser           | ns                |
|       | Deficient          | m.13783 C>T | C       | T           | 75%                | <i>MT-ND6</i>              | GTA          | Val-Val           | syn               |
| 19    | Deficient          | m.5976 A>T  | A       | T           | 25%                | <i>MT-CO1</i>              | TCA          | Thr-Ser           | ns                |
| 20    | Deficient          | m.2083 G>A  | G       | A           | 75%                | <i>MT-16SrRNA</i>          |              |                   |                   |
|       | Deficient          | m.2386 A>T  | A       | T           | 50%                | <i>MT-16SrRNA</i>          |              |                   |                   |
|       | Deficient          | m.4879 C>T  | C       | T           | 25%                | <i>MT-ND2</i>              | CCT          | Pro-Pro           | syn               |

| Crypt | COX Histochemistry | Mutation    | WT base | Mutant base | Heteroplasmy level | Gene               | Codon change | Amino acid change | Substitution type |
|-------|--------------------|-------------|---------|-------------|--------------------|--------------------|--------------|-------------------|-------------------|
|       | Deficient          | m.5096 G>A  | G       | A           | 75%                | <i>MT-tRNA N</i>   |              |                   |                   |
|       | Deficient          | m.5647 C>T  | C       | T           | 75%                | <i>MT-CO1</i>      | CTA          | Pro-Leu           | ns                |
|       | Deficient          | m.6241 T>C  | T       | C           | 50%                | <i>MT-CO1</i>      | TCT          | Phe-Ser           | ns                |
|       | Deficient          | m.6850 C>T  | C       | T           | 50%                | <i>MT-CO1</i>      | CTA          | Pro-Leu           | ns                |
|       | Deficient          | m.8864 C>G  | C       | G           | 75%                | <i>MT-CO3</i>      | TTG          | Phe-Leu           | ns                |
|       | Deficient          | m.9985 G>A  | G       | A           | 75%                | <i>MT-ND4L</i>     | ATA          | Val-Met           | ns                |
|       | Deficient          | m.11710 C>T | C       | T           | 75%                | <i>MT- tRNA I2</i> |              |                   |                   |
|       | Deficient          | m.13789 C>T | C       | T           | 50%                | <i>MT-ND6</i>      | TTA          | Leu-Leu           | syn               |
|       | Deficient          | m.13967 C>T | C       | T           | 75%                | <i>MT-ND6</i>      | AAT          | Ser-Asn           | ns                |
| 21    | Deficient          | m.14808 C>T | C       | T           | 100%               | <i>MT-CYB</i>      | TCC          | Pro-Ser           | ns                |
|       | Deficient          | m.14818 C>T | C       | T           | 25%                | <i>MT-CYB</i>      | ATA          | Thr-Met           | ns                |
|       | Deficient          | m.14925 C>T | C       | T           | 100%               | <i>MT-CYB</i>      | TCA          | Pro-Ser           | ns                |
|       | Deficient          | m.14938 C>T | C       | T           | 25%                | <i>MT-CYB</i>      | CTA          | Pro-Leu           | ns                |
| 22    | Deficient          | m.5536 T>A  | T       | A           | 75%                | <i>MT-CO1</i>      | GAA          | Val-Glu           | ns                |
|       | Deficient          | m.6964 C>T  | C       | T           | 75%                | <i>MT-tRNA D</i>   | -            |                   | -                 |
|       | Deficient          | m.7164 C>T  | C       | T           | 75%                | <i>MT-CO2</i>      | ATA          | Thr-met           | ns                |
|       | Deficient          | m.9520 C>T  | C       | T           | 75%                | <i>MT-ND3</i>      | GTA          | Ala-Val           | ns                |
|       | Deficient          | m.16166 A>T | A       | T           | 75%                | <i>ctrl region</i> | -            |                   | -                 |
|       | Deficient          | m.16286 A>G | A       | G           | 75%                | <i>ctrl region</i> | -            |                   | -                 |
| 23    | Deficient          | m.2679 A>T  | A       | T           | 100%               | <i>MT-tRNA L1</i>  | -            |                   | -                 |
|       | Deficient          | m.4890 T>A  | T       | A           | 50%                | <i>MT-ND1</i>      | TAT          | Phe-Tyr           | ns                |
|       | Deficient          | m.5686 C>T  | C       | T           | 25%                | <i>MT-CO1</i>      | GTA          | Ala-Val           | ns                |
|       | Deficient          | m.6342 C>T  | C       | T           | 75%                | <i>MT-CO1</i>      | TTA          | Leu-Leu           | syn               |
|       | Deficient          | m.11012 A>T | A       | T           | 100%               | <i>MT-ND4</i>      | TTT          | Leu-Phe           | ns                |
|       | Deficient          | m.11429 C>T | C       | T           | 25%                | <i>MT-ND4</i>      | AAT          | Asn-Asn           | syn               |
|       | Deficient          | m.12080 C>T | C       | T           | 100%               | <i>MT-ND5</i>      | AAT          | Asn-Asn           | syn               |
|       | Deficient          | m.12143 C>T | C       | T           | 100%               | <i>MT-ND5</i>      | GCT          | Ala-Ala           | syn               |
| 24    | Deficient          | m.2078 A>T  | A       | T           | 100%               | <i>MT-16SrRNA</i>  |              |                   |                   |

| Crypt | COX Histochemistry | Mutation    | WT base | Mutant base | Heteroplasmy level | Gene               | Codon change | Amino acid change | Substitution type |
|-------|--------------------|-------------|---------|-------------|--------------------|--------------------|--------------|-------------------|-------------------|
|       | Deficient          | m.4885 A>T  | A       | T           | 75%                | <i>MT-ND2</i>      | CTT          | Leu-Leu           | syn               |
|       | Deficient          | m.6472 C>T  | C       | T           | 75%                | <i>MT-CO1</i>      | TTA          | ser-Leu           | ns                |
|       | Deficient          | m.9203 G>A  | G       | A           | 75%                | <i>MT-CO3</i>      | ATA          | Met-Met           | syn               |
|       | Deficient          | m.11951 C>T | C       | T           | 100%               | <i>MT-ND5</i>      | ACT          | Thr-Thr           | syn               |
|       | Deficient          | m.14905 A>G | A       | G           | 75%                | <i>MT-CYB</i>      | GGC          | Asp-Gln           | ns                |
|       | Deficient          | m.15921 T>A | T       | A           | 100%               | <i>Ctrl Region</i> |              |                   |                   |
| 25    | Deficient          | m.1776 T>A  | T       | A           | 75%                | <i>MT-16SrRNA</i>  | -            |                   | -                 |
|       | Deficient          | m.5521 T>C  | T       | C           | 50%                | <i>MT-CO1</i>      | ACA          | Met-Thr           | ns                |
|       | Deficient          | m.5931 C>A  | C       | A           | 75%                | <i>MT-CO1</i>      | ATA          | leu-Met           | ns                |
|       | Deficient          | m.6484 T>A  | T       | A           | 75%                | <i>MT-CO1</i>      | GAG          | Val-Glu           | ns                |
|       | Deficient          | m.8627 A>G  | A       | G           | 50%                | <i>MT-CO3</i>      | GCG          | Ala-Ala           | syn               |
|       | Deficient          | m.8631 C>T  | C       | T           | 50%                | <i>MT-CO3</i>      | TAC          | His-Tyr           | ns                |
|       | Deficient          | m.8650 C>T  | C       | T           | 50%                | <i>MT-CO3</i>      | CTA          | Pro-Leu           | ns                |
|       | Deficient          | m.9505 A>G  | A       | G           | 50%                | <i>MT-ND3</i>      | AGG          | Thr-Null          | ns                |
|       | Deficient          | m.11172 C>T | C       | T           | 75%                | <i>MT-ND4</i>      | TGG          | Arg-Trp           | ns                |
|       | Deficient          | m.11698 G>A | G       | A           | 25%                | <i>MT-tRNA L2</i>  | -            |                   | -                 |
|       | Deficient          | m.12218 C>T | C       | T           | 50%                | <i>MT-ND5</i>      | TAT          | Tyr-Tyr           | syn               |
|       | Deficient          | m.12706 C>T | C       | T           | 25%                | <i>MT-ND5</i>      | CTA          | Pro-Leu           | ns                |
|       | Deficient          | m.14462 A>T | A       | T           | 50%                | <i>MT-CYB</i>      | TCT          | Ser-Ser           | syn               |
| 26    | Deficient          | m.192 A>G   | A       | G           | 50%                | <i>MT-12SrRNA</i>  | -            |                   | -                 |
|       | Deficient          | m.424 G>T   | G       | T           | 25%                | <i>MT-12SrRNA</i>  | -            |                   | -                 |
|       | Deficient          | m.3497 C>T  | C       | T           | 50%                | <i>MT-ND1</i>      | ATT          | Ile-Ile           | syn               |
|       | Deficient          | m.3553 C>T  | C       | T           | 50%                | <i>MT-ND1</i>      | TTA          | Ser-Leu           | ns                |
|       | Deficient          | m.3609 C>T  | C       | T           | 25%                | <i>MT-ND1</i>      | TAT          | His-Tyr           | ns                |
|       | Deficient          | m.5697 A>G  | A       | G           | 75%                | <i>MT-CO1</i>      | GCA          | Thr-Ala           | ns                |
|       | Deficient          | m.6047 C>T  | C       | T           | 75%                | <i>MT-CO1</i>      | CAT          | His-His           | syn               |
|       | Deficient          | m.6386 A>G  | A       | G           | 75%                | <i>MT-CO1</i>      | CTG          | Leu-Leu           | syn               |
|       | Deficient          | m.6444 G>A  | G       | A           | 75%                | <i>MT-CO1</i>      | ATA          | Val-Met           | ns                |

| Crypt     | COX Histochemistry | Mutation     | WT base | Mutant base | Heteroplasmy level | Gene              | Codon change      | Amino acid change | Substitution type |
|-----------|--------------------|--------------|---------|-------------|--------------------|-------------------|-------------------|-------------------|-------------------|
|           | Deficient          | m.15323 A>G  | A       | G           | 25%                | <i>MT-tRNA T</i>  | -                 |                   | -                 |
| 27        | Deficient          | m.13033 C>T  | C       | T           | 25%                | <i>MT-ND5</i>     | ATA               | Thr-Met           | ns                |
|           | Deficient          | m.14024 C>T  | C       | T           | 25%                | <i>MT-ND6</i>     | AAA               | Cys-Lys           | ns                |
| 28        | Deficient          | m.4879 C>T   | C       | T           | 25%                | <i>MT-ND2</i>     | CCT               | Pro-Pro           | syn               |
|           | Deficient          | m.5096 G>A   | G       | A           | 50%                | <i>MT-tRNA N</i>  |                   |                   |                   |
|           | Deficient          | m.13457 C>T  | C       | T           | 25%                | <i>MT-ND5</i>     | AAT               | Asn-Asn           | syn               |
| 29        | Deficient          | m.568 G>A    | G       | A           | 100%               | <i>MT-12SrRNA</i> |                   |                   |                   |
|           | Deficient          | m.635 C>T    | C       | T           | 75%                | <i>MT-12SrRNA</i> |                   |                   |                   |
|           | Deficient          | m.655 C>T    | C       | T           | 75%                | <i>MT-12SrRNA</i> |                   |                   |                   |
|           | Deficient          | m.2357 G>A   | G       | A           | 75%                | <i>MT-16SrRNA</i> |                   |                   |                   |
|           | Deficient          | m.2712 A>T   | A       | T           | 75%                | <i>MT-tRNA L1</i> |                   |                   |                   |
|           | Deficient          | m.2898 G>A   | G       | A           | 75%                | <i>MT-ND1</i>     | ACA               | Ala-Thr           | ns                |
|           | Deficient          | m.5357 C>T   | C       | T           | 100%               | <i>MT-CO1</i>     | ACT               | Thr-Thr           | syn               |
|           | Deficient          | m.6147 G>A   | G       | A           | 75%                | <i>MT-CO1</i>     | ATA               | Val-Met           | ns                |
|           | Deficient          | m.6486 T>A   | T       | A           | 75%                | <i>MT-CO1</i>     | ATT               | Phe-Ile           | ns                |
|           | Deficient          | m.10449 T>C  | T       | C           | 75%                | <i>MT-ND4</i>     | CAC               | Tyr-His           | ns                |
|           | Deficient          | m.11236 C>T  | C       | T           | 75%                | <i>MT-ND4</i>     | ATA               | Thr-Met           | ns                |
|           | Deficient          | m.12829 C>T  | C       | T           | 25%                | <i>MT-ND5</i>     | ATA               | Thr-Met           | ns                |
| Deficient | m.13971 C>T        | C            | T       | 75%         | <i>MT-ND6</i>      | TAA               | Val-Leu           | ns                |                   |
| 1         | Positive           | m.3716 C > G | C       | G           | 50%                | <i>MT-tRNA I</i>  | disrupts DHU stem |                   | -                 |
|           | Positive           | m.7961 C > T | C       | T           | 50%                | <i>MT-ATP8/6</i>  | TAA               | Pro-Leu/Gln-STOP  | ns/ns             |
|           | Positive           | m.13224 G>A  | G       | A           | 50%                | <i>MT-ND5</i>     | ATA               | Val-Met           | ns                |
|           | Positive           | m.15116 G>A  | G       | A           | 25%                | <i>MT-CYB</i>     | TTA               | Leu-Leu           | syn               |
| 2         | Positive           | m.2291 T>C   | T       | C           | 50%                | <i>MT-16SrRNA</i> |                   |                   | -                 |
| 3         | Positive           | m.5957 A>G   | A       | G           | 25%                | <i>MT-CO1</i>     | CTG               | Leu-Leu           | syn               |

| Crypt    | COX Histochemistry | Mutation     | WT base | Mutant base | Heteroplasmy level | Gene              | Codon change | Amino acid change | Substitution type |
|----------|--------------------|--------------|---------|-------------|--------------------|-------------------|--------------|-------------------|-------------------|
|          | Positive           | m.12723 C>T  | C       | T           | 25%                | <i>MT-ND5</i>     | TAC          | His-Tyr           | ns                |
|          | Positive           | m.12783 C>T  | C       | T           | 75%                | <i>MT-ND5</i>     | TAT          | His-Tyr           | ns                |
| 4        | Positive           | m.3084T>C    | T       | C           | 25%                | <i>MT-ND1</i>     | CCA          | Ser-Pro           | ns                |
|          | Positive           | m.8578 G>A   | G       | A           | 75%                | <i>MT-ATP6</i>    | ATA          | Val-Met           | ns                |
|          | Positive           | m.11970 A>G  | A       | G           | 75%                | <i>MT-ND5</i>     | GAA          | Lys-Glu           | ns                |
|          | Positive           | m.12783 C>T  | C       | T           | 50%                | <i>MT-ND5</i>     | TAT          | His-Tyr           | ns                |
|          | Positive           | m. 13200 A>T | A       | T           | 50%                | <i>MT-ND5</i>     | TAA          | Lys-STOP          | ns                |
|          | Positive           | m.15164 C>T  | C       | T           | 50%                | <i>MT-CYB</i>     | GGT          | Gly-Gly           | syn               |
| 5        | Positive           | m.381 A>T    | A       | T           | 75%                | <i>MT-16SrRNA</i> |              |                   | -                 |
|          | Positive           | m.6265 C>T   | C       | T           | 50%                | <i>MT-CO1</i>     | GTA          | Ala-Val           | ns                |
|          | Positive           | m.7860 C>T   | C       | T           | 25%                | <i>MT-ATP8</i>    | ATA          | Thr-Met           | ns                |
|          | Positive           | m.8079 A>T   | A       | T           | 50%                | <i>MT-ATP6</i>    | AAT          | Lys-Asn           | ns                |
|          | Positive           | m.8126 C>T   | C       | T           | 50%                | <i>MT-ATP6</i>    | ATA          | Thr-Met           | ns                |
|          | Positive           | m.10717 A>T  | A       | T           | 50%                | <i>MT-ND4</i>     | CTC          | His-Leu           | ns                |
|          | Positive           | m.12105 A>T  | A       | T           | 75%                | <i>MT-ND5</i>     | TCA          | Thr-Ser           | ns                |
|          | Positive           | m.12353 C>T  | C       | T           | 75%                | <i>MT-ND5</i>     | TCT          | Ser-Ser           | syn               |
|          | Positive           | m.12592 C>T  | C       | T           | 75%                | <i>MT-ND5</i>     | ATC          | Thr-Ile           | ns                |
| Positive | m. 14658 A>T       | A            | T       | 75%         | <i>MT-CYB</i>      | TAA               | Lys-STOP     | ns                |                   |
| 6        | Positive           | m.3541 T>C   | T       | C           | 50%                | <i>MT-ND1</i>     | CCA          | Leu-Pro           | ns                |
|          | Positive           | m.5966 C>T   | C       | T           | 25%                | <i>MT-CO1</i>     | CGT          | Arg-Arg           | syn               |
|          | Positive           | m.8048 G>A   | G       | A           | 25%                | <i>MT-ATP6</i>    | CAT          | Arg-His           | ns                |
|          | Positive           | m.8489 C>T   | C       | T           | 50%                | <i>MT-ATP6</i>    | ATA          | Thr-Met           | ns                |
|          | Positive           | m.11001 C>T  | C       | T           | 25%                | <i>MT-ND4</i>     | TAA          | Gln-STOP          | ns                |
|          | Positive           | m.11113 T>C  | T       | C           | 50%                | <i>MT-ND4</i>     | ACA          | Met-Thr           | ns                |
|          | Positive           | m.11180 C>T  | C       | T           | 25%                | <i>MT-ND4</i>     | CAT          | His-His           | syn               |
|          | Positive           | m.13403 C>T  | C       | T           | 75%                | <i>MT-ND5</i>     | GAT          | Asp-Asp           | syn               |
