# Supplementary material for: Similar patterns of clonally expanded somatic mtDNA mutations in the colon of heterozygous mtDNA mutator mice and ageing humans
Source: PubMed Central journal article supplement (PMC4141908; doi:10.1016/j.mad.2014.06.003), 2014-07
Supplement: mmc3.pdf [file mmc3.pdf]

|                  | Mutation frequency in COX +ve crypts |          | Mutation frequency in COX -ve crypts |          |
|------------------|--------------------------------------|----------|--------------------------------------|----------|
|                  | PolgA <sup>+mut</sup> mice           | Humans   | PolgA <sup>+mut</sup> mice           | Humans   |
| Transitions      | 44 (80%)                             | 28 (85%) | 150 (81%)                            | 82 (86%) |
| Transversions    | 11 (20%)                             | 2 (6%)   | 36 (19%)                             | 5 (5%)   |
| Ins/Dels         | 0                                    | 3 (9%)   | 0                                    | 9(9%)    |
| Complex 1        | 27 (49%)                             | 8 (24%)  | 64 (34%)                             | 23 (24%) |
| Complex 3        | 6 (11%)                              | 1 (3%)   | 14 (8%)                              | 7 (7%)   |
| Complex 4        | 6 (11%)                              | 9 (27%)  | 51 (27%)                             | 29 (30%) |
| Complex 5        | 10 (18%)                             | 0        | 4 (2%)                               | 2 (2%)   |
| non-coding RNA   | 6 (11%)                              | 9 (27%)  | 47 (25%)                             | 26 (27%) |
| non-coding mtDNA | 0                                    | 6 (18%)  | 6 (3%)                               | 9 (9%)   |

Supplementary File 3: Table comparing the location, types and frequency of mtDNA point mutations in colonic crypts from *PolgA*<sup>+Mut</sup> mice and aged humans (Greaves et al 2012). Ins/Dels - Insertions and deletions
