# Supplementary material for: Similar patterns of clonally expanded somatic mtDNA mutations in the colon of heterozygous mtDNA mutator mice and ageing humans
Source: PubMed Central journal article supplement (PMC4141908; doi:10.1016/j.mad.2014.06.003), 2014-07
Supplement: mmc4.pdf [file mmc4.pdf]

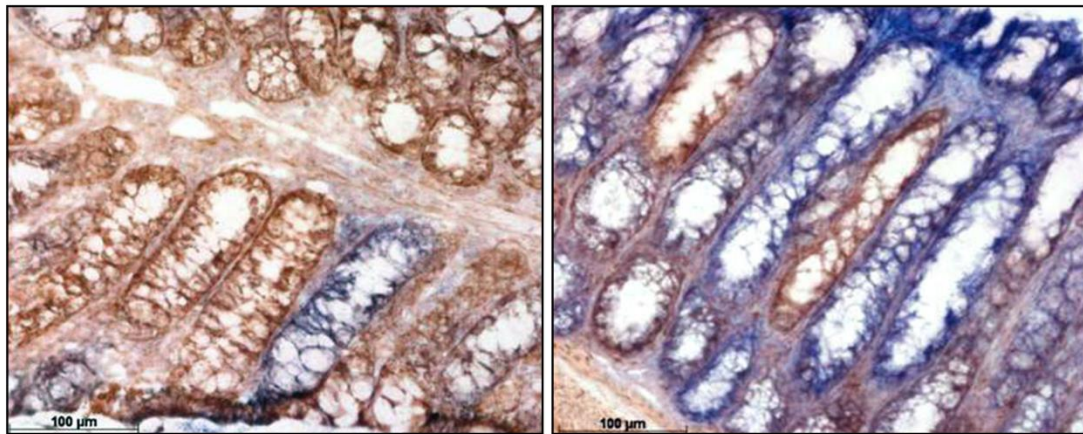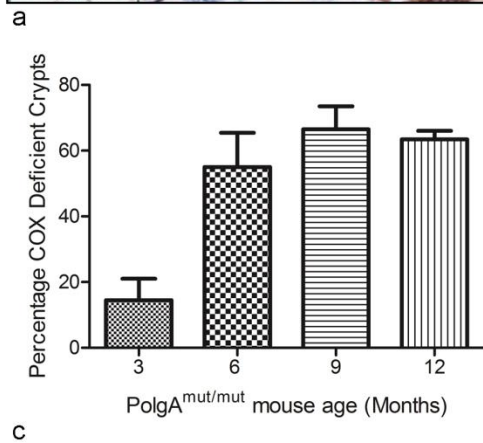

**Supplementary File 4: Respiratory chain deficiency in ageing *PolgA<sup>mut/mut</sup>* mouse colon.** (a) COX/SDH histochemistry on 3 month old *PolgA<sup>mut/mut</sup>* mouse colon. (b): COX/SDH histochemistry on 12 month old *PolgA<sup>mut/mut</sup>* mouse colon. Crypts stained brown are positive for COX activity, those stained blue are COX deficient and those stained purple/grey display intermediate COX deficiency. (c): Mean incidence ( $\pm$  SEM) of COX deficient colonic crypts in 3, 6, 9 and 12 month old *PolgA<sup>mut/mut</sup>* mice.
